# Supplementary material for: Development of Yellow-to-Orange Photoluminescence Molecules Based on Alterations in the Donor Units of Fluorinated Tolanes
Source: MDPI journal article supplement (doi:10.3390/molecules27185782), 2022-09-07
Supplement: s1 [file s1]

## *Electronic Supplementary Information*

# **Development of yellow-to-orange photoluminescence molecules based on alterations in the donor units of fluorinated tolans**

**Shigeyuki Yamada <sup>1,\*</sup>, Kazuki Kobayashi <sup>1</sup>, and Tsutomu Konno <sup>1</sup>**

<sup>1</sup>Faculty of Molecular Chemistry and Engineering, Kyoto Institute of Technology,  
Matsugasaki, Sakyo-ku, Kyoto 606-8585, Japan.

\*Correspondence: [syamada@kit.ac.jp](mailto:syamada@kit.ac.jp) (S.Y.); Tel.: +81-75-724-7517

### Table of Contents

|                                    |            |      |
|------------------------------------|------------|------|
| 1. Synthesis                       | •••••••••• | S-2  |
| 2. NMR Spectra                     | •••••••••• | S-3  |
| 3. X-ray crystallographic analysis | •••••••••• | S-12 |
| 4. DFT Calculation                 | •••••••••• | S-12 |
| Cartesian coordinate               | •••••••••• | S-13 |
| 5. Photophysical Characteristics   | •••••••••• | S-19 |
| 6. DLS measurement                 | •••••••••• | S-25 |

## 1. Synthesis

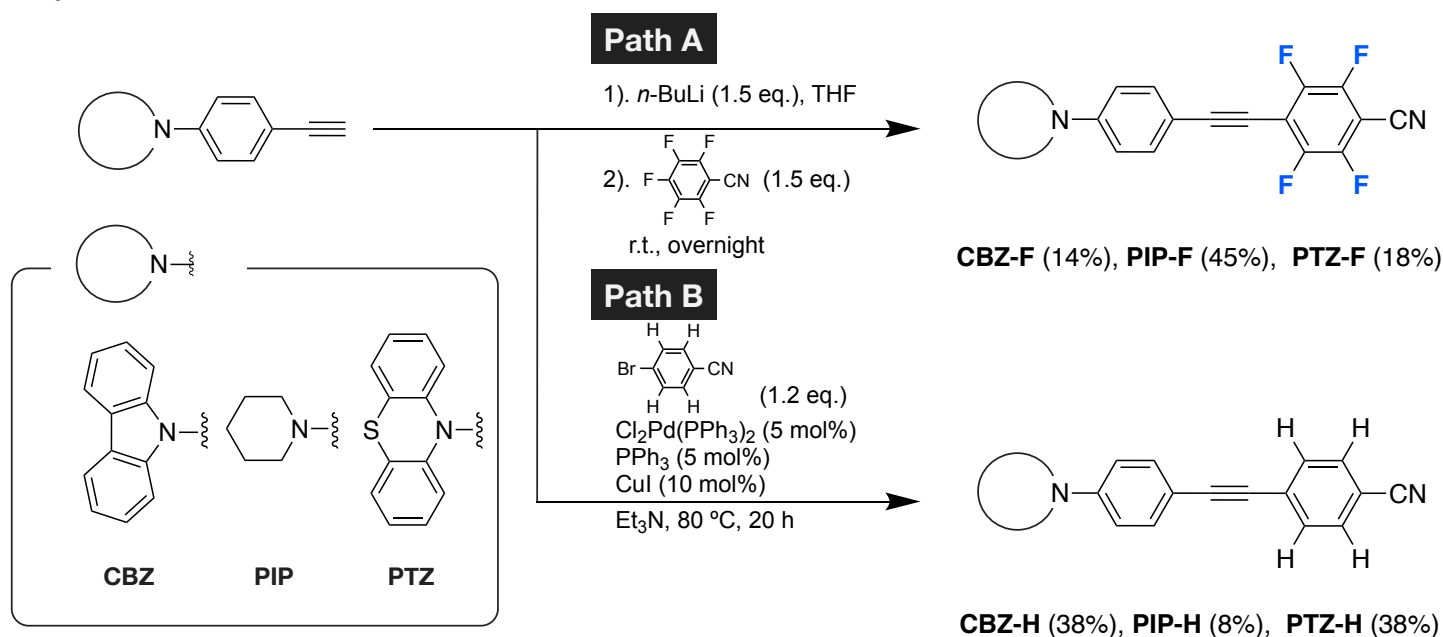

### Typical synthesis procedure for Fluorinated tolans: Path A

In a two-necked round-bottomed flask, 4-aminophenylacetylene was added to THF, and the mixture was cooled to 0 °C. *n*-butyllithium (1.6 mol L<sup>-1</sup> hexane solution) was added dropwise to this mixture, and the resulting solution was continuously stirred at 0 °C for 0.5 h. Pentafluorobenzonitrile was then added dropwise to the solution. After the addition was complete, the reaction mixture was warmed to 25 °C and stirred for overnight. The reaction mixture was then poured into a saturated aqueous NH<sub>4</sub>Cl solution, the crude product was extracted with ethyl acetate (EtOAc) three times, and the combined organic layer was washed with brine. The organic layer was dried over anhydrous sodium sulfate (Na<sub>2</sub>SO<sub>4</sub>), which was then separated by filtration. The filtrate was evaporated in vacuo and purified by silica-gel column chromatography (eluent: hexane/EtOAc = 10/1), followed by recrystallization from a mixed solvent system (hexane/CHCl<sub>3</sub> = 1/1), which afforded the corresponding fluorinated tolans, in 14-45% isolated yield.

### Typical synthesis procedure for non-Fluorinated tolans: Path B

In a two-necked round-bottomed flask were added 4-aminophenylacetylene, dichlorobis(triphenylphosphine)palladium(0), triphenylphosphine, copper(I) iodide, 4-bromobenzonitrile, and triethylamine. The resultant mixture was stirred at 80 °C for 20 h. The precipitate formed during the reaction was separated by atmospheric filtration, and the filtrate was poured into a saturated aqueous NH<sub>4</sub>Cl solution. The crude product was extracted three times with ethyl acetate (EtOAc), and the combined organic layer was washed once with brine. The organic layer was dried over anhydrous sodium sulfate (Na<sub>2</sub>SO<sub>4</sub>), which was separated by filtration. The filtrate was evaporated in vacuo and purified by silica-gel column chromatography (eluent: hexane/EtOAc = 20/1), followed by recrystallization from a mixed solvent system (hexane/CH<sub>2</sub>Cl<sub>2</sub> = 1/1) to afford the corresponding non-fluorinated tolane, in 8-38% isolated yield.

## 2. NMR Spectra

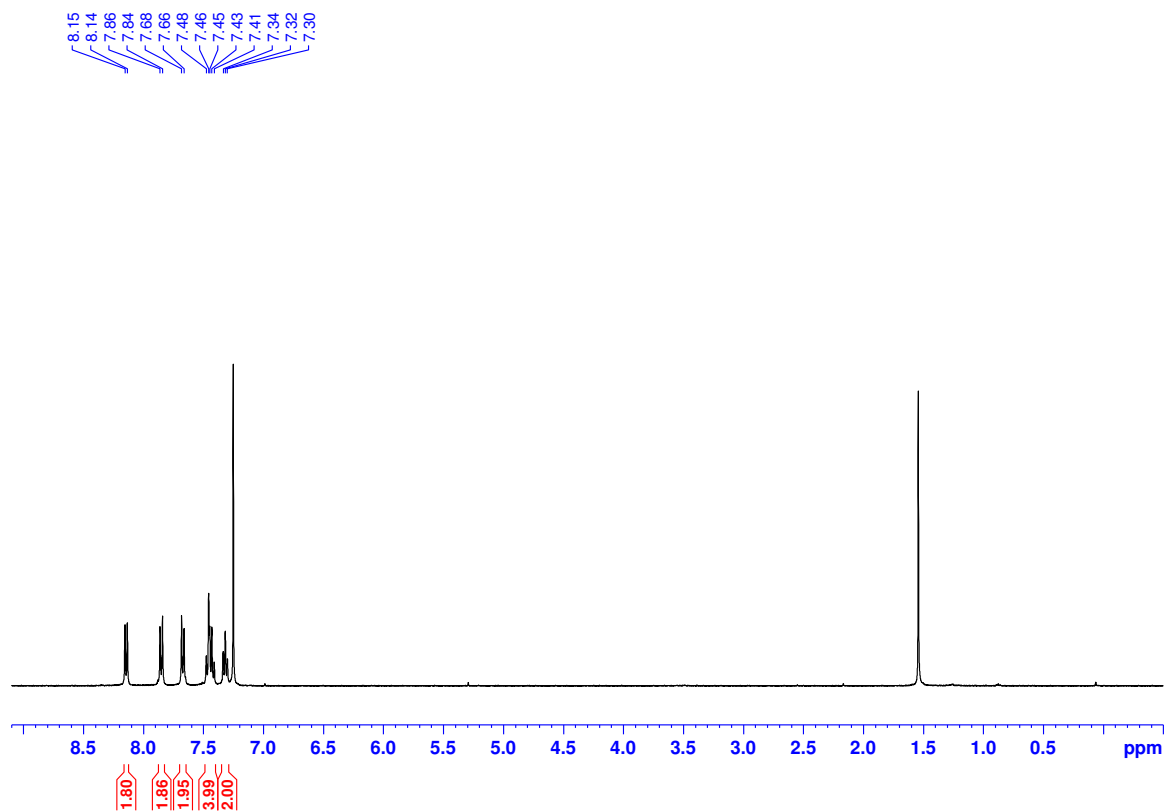

**Figure S1.** <sup>1</sup>H NMR spectrum of CBZ-F (400 MHz, CDCl<sub>3</sub>).

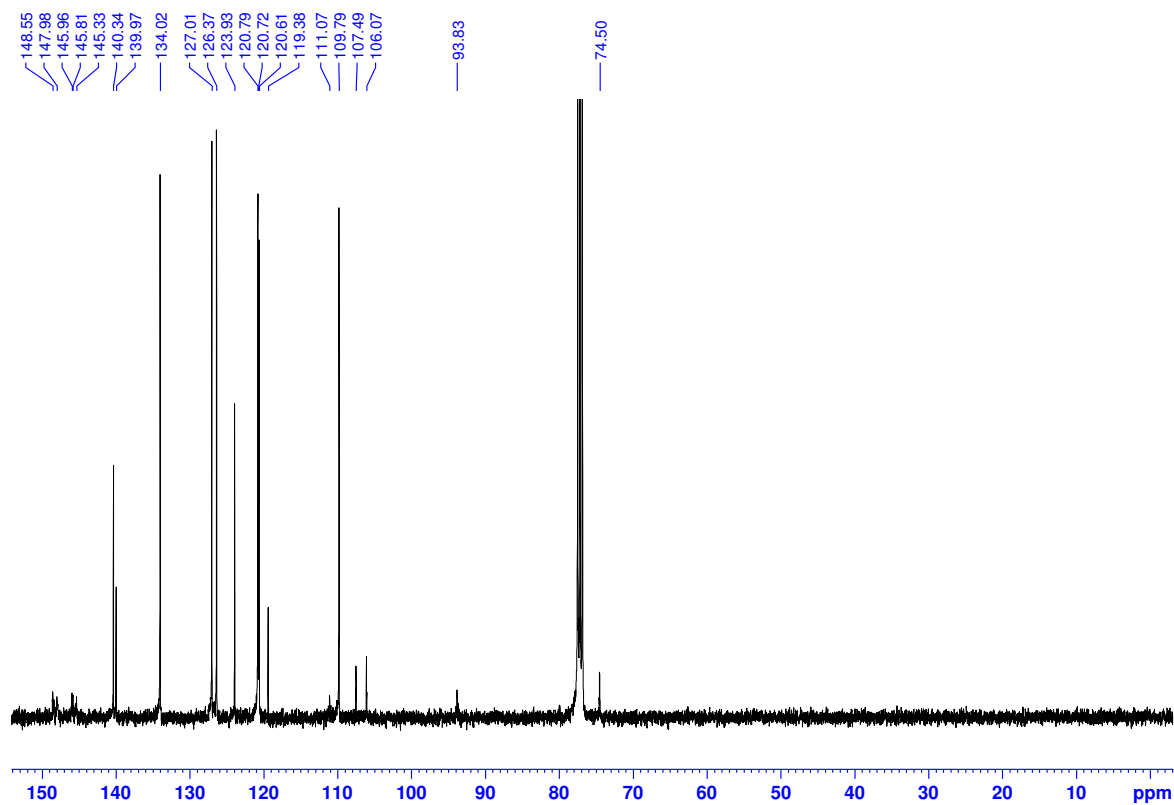

**Figure S2.** <sup>13</sup>C NMR spectrum of CBZ-F (100 MHz, CDCl<sub>3</sub>).

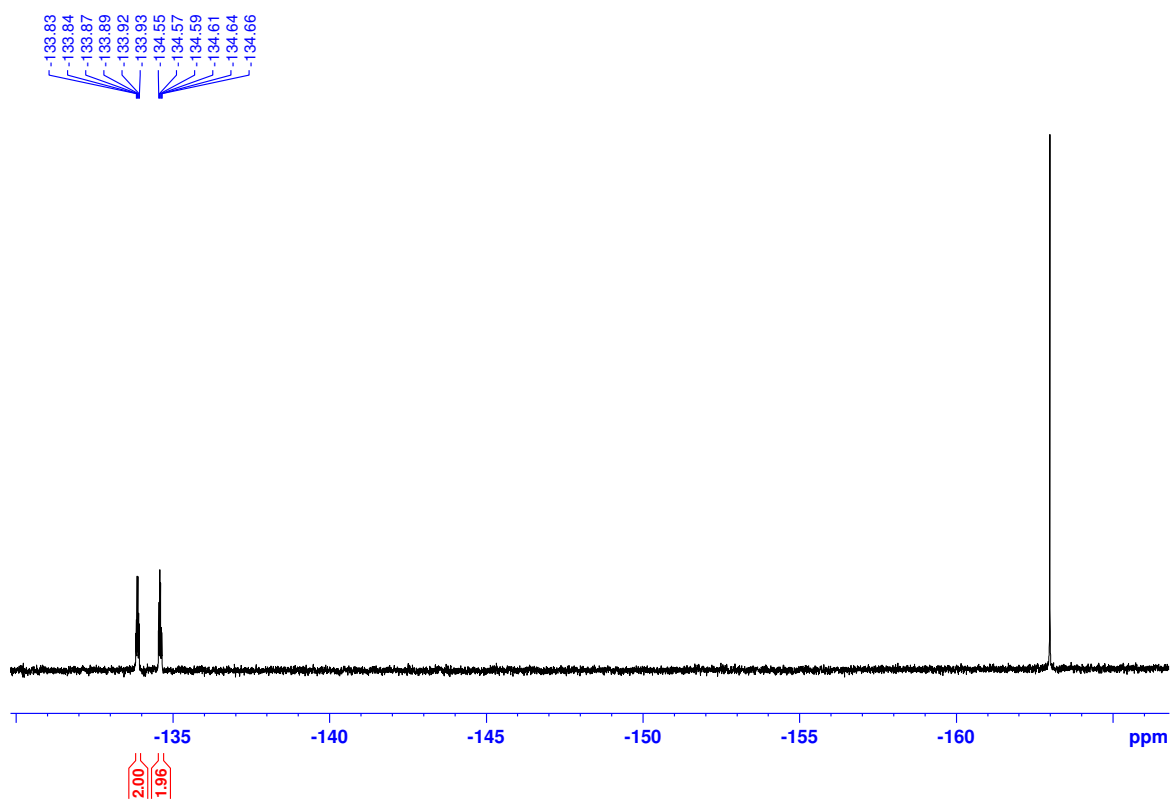

**Figure S3.**  $^{19}\text{F}$  NMR spectrum of CBZ-F (376 MHz,  $\text{CDCl}_3$ , hexafluorobenzene  $\delta_{\text{F}} = -163$  ppm).

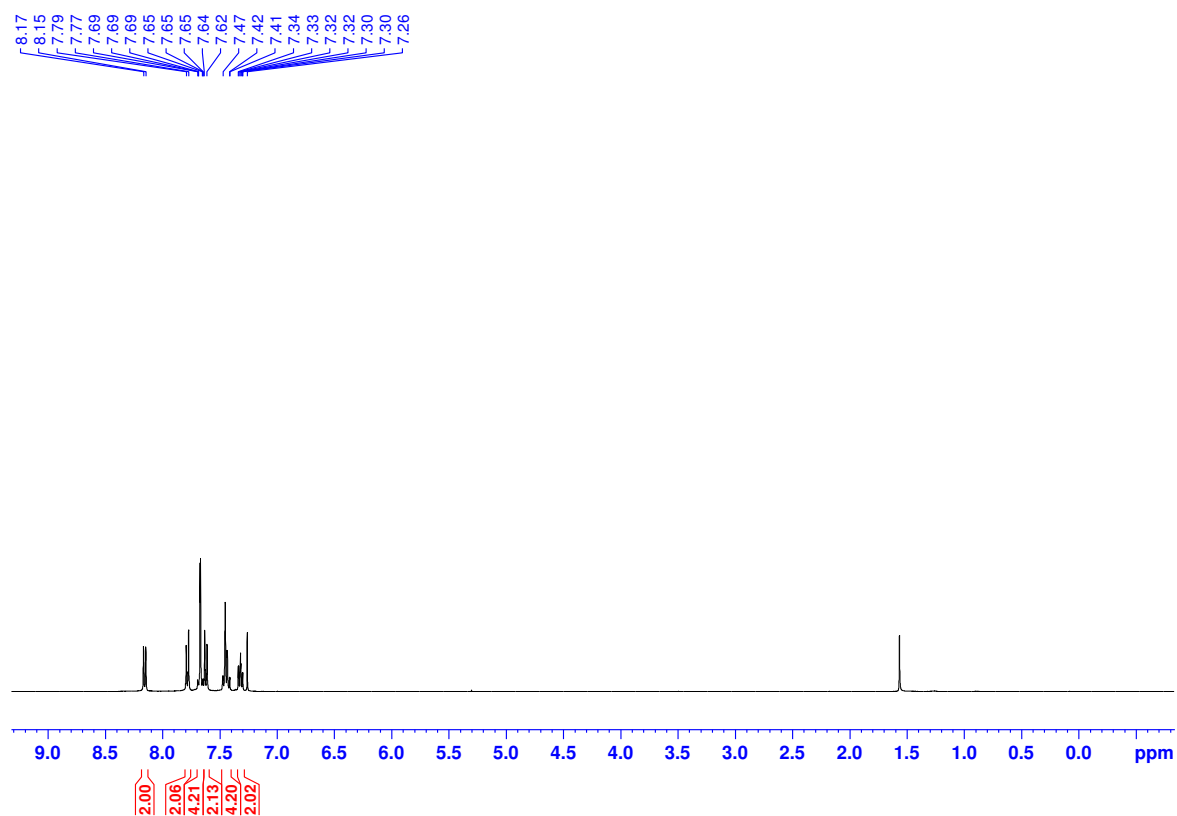

**Figure S4.** <sup>1</sup>H NMR spectrum of **CBZ-H** (400 MHz, CDCl<sub>3</sub>).

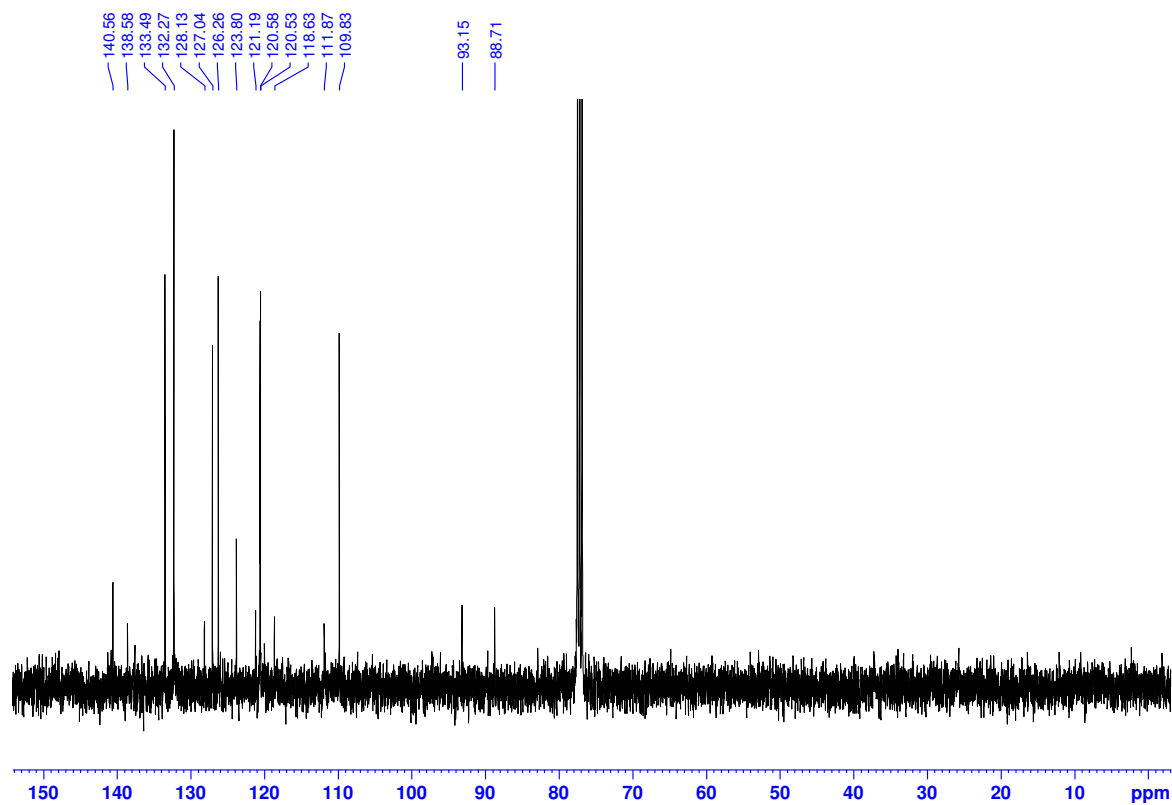

**Figure S5.** <sup>13</sup>C NMR spectrum of **CBZ-H** (100 MHz, CDCl<sub>3</sub>).

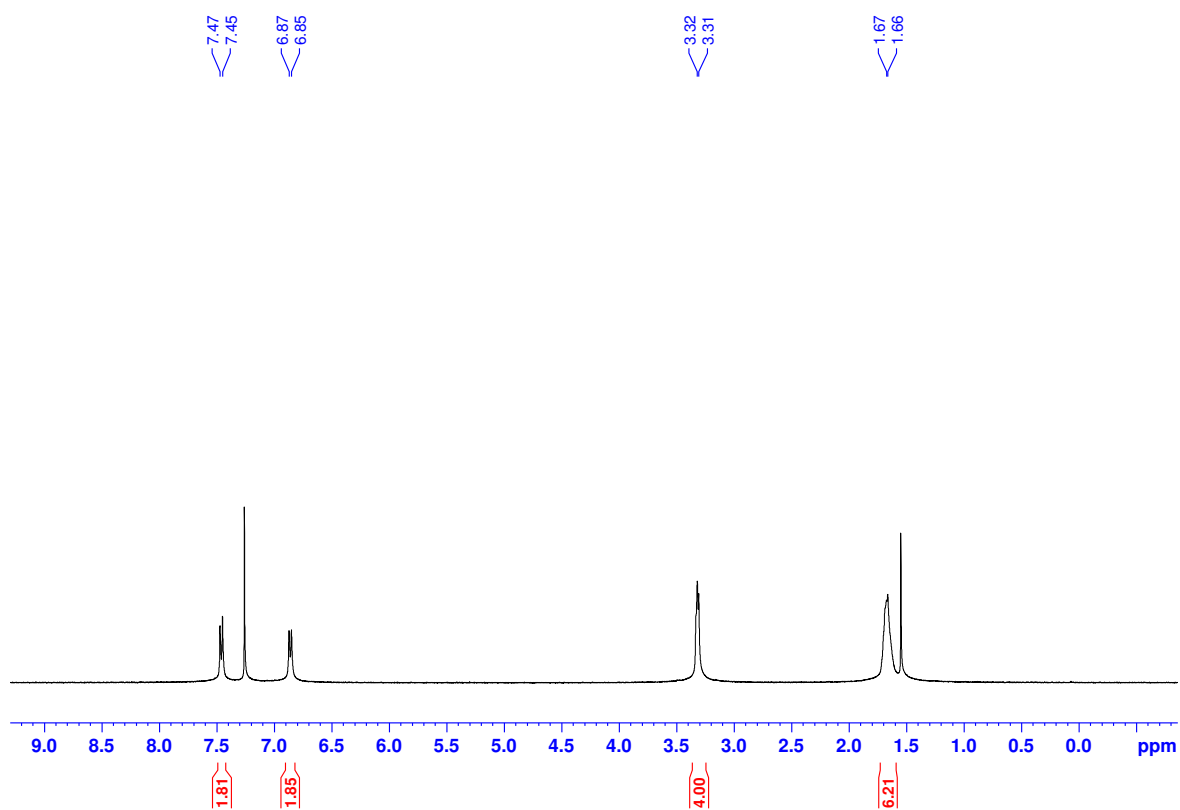

**Figure S6.** <sup>1</sup>H NMR spectrum of PIP-F (400 MHz, CDCl<sub>3</sub>).

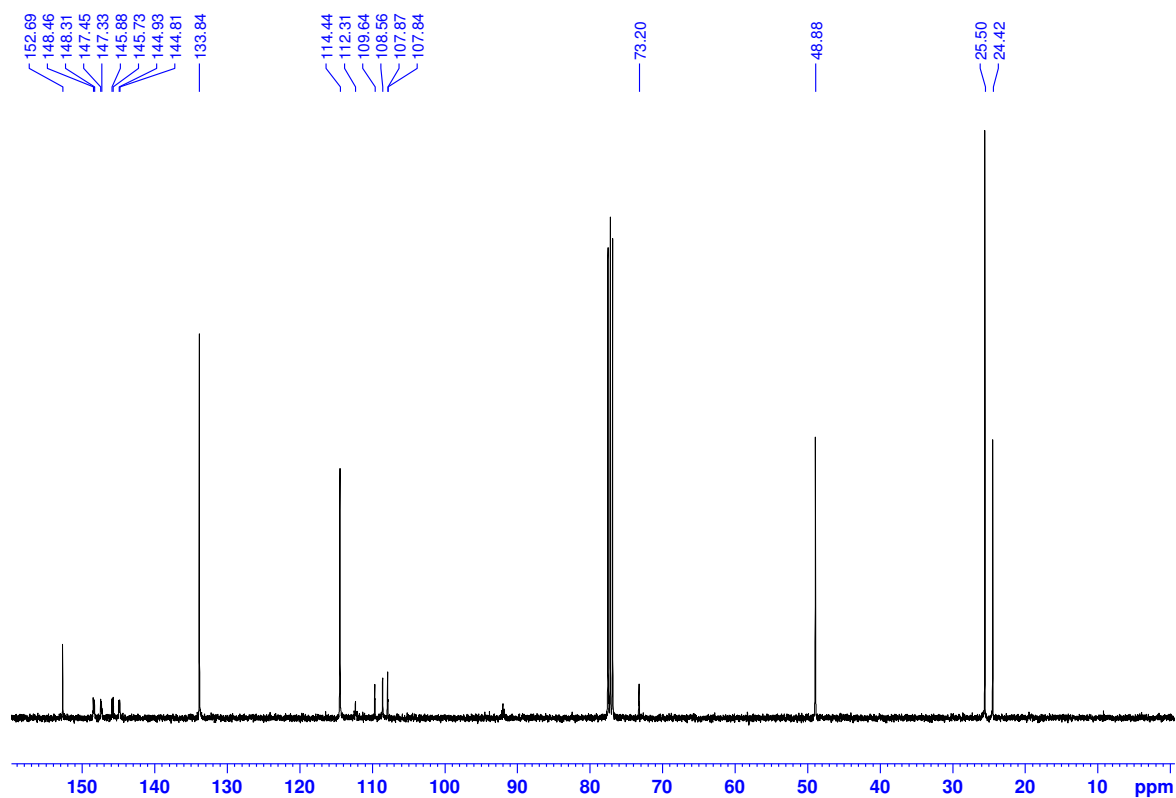

**Figure S7.** <sup>13</sup>C NMR spectrum of PIP-F (100 MHz, CDCl<sub>3</sub>).

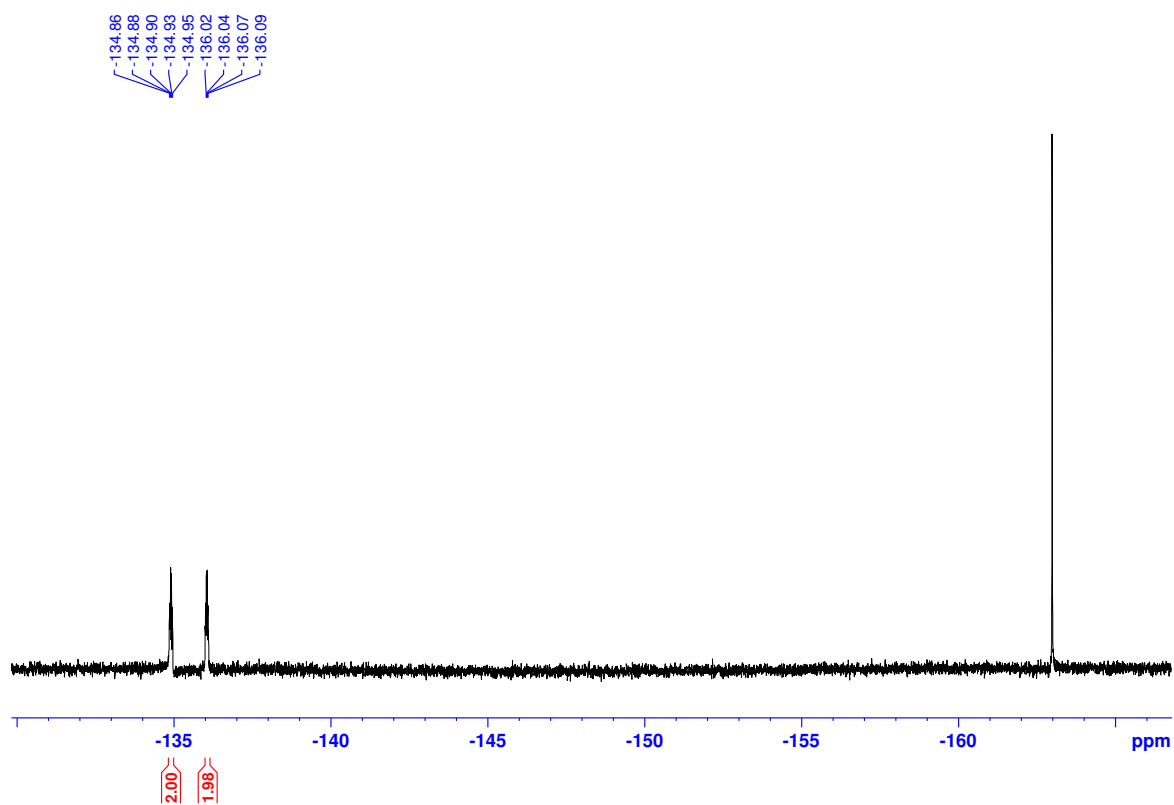

**Figure S8.**  $^{19}\text{F}$  NMR spectrum of **PIP-F** (376 MHz,  $\text{CDCl}_3$ , hexafluorobenzene  $\delta_{\text{F}} = -163$  ppm).

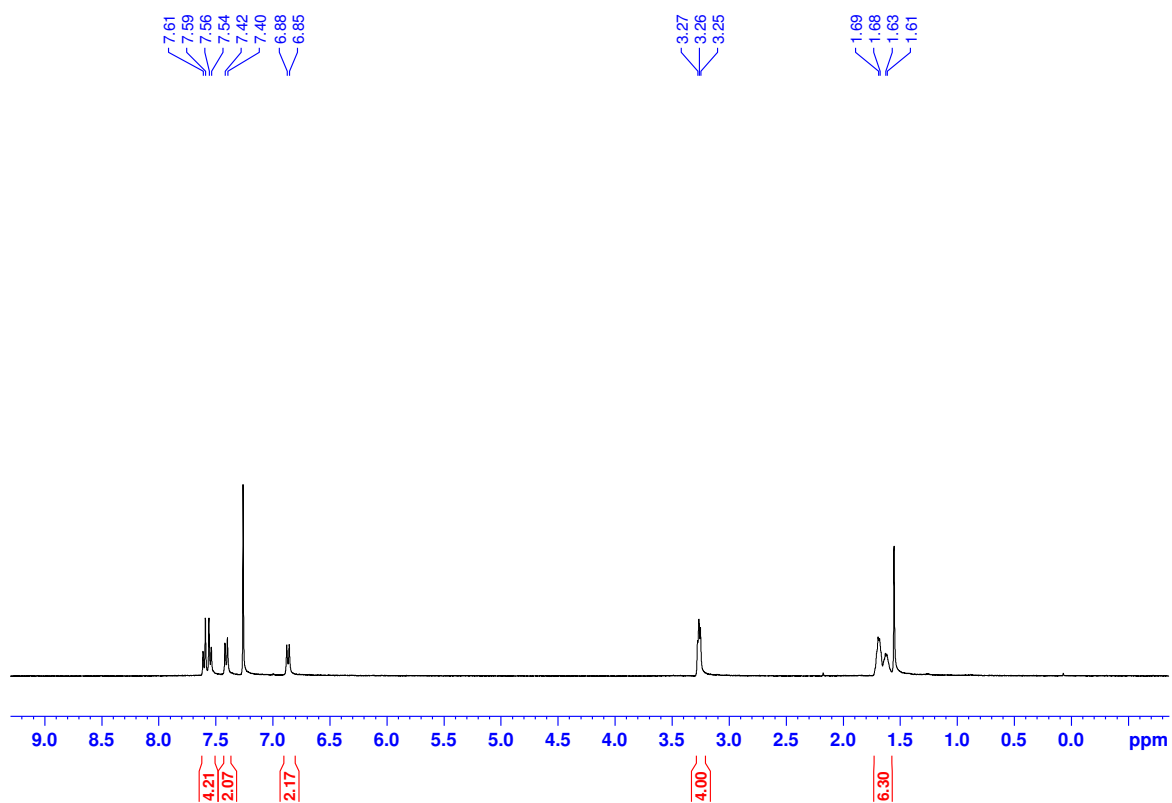

**Figure S9.** <sup>1</sup>H NMR spectrum of PIP-H (400 MHz, CDCl<sub>3</sub>).

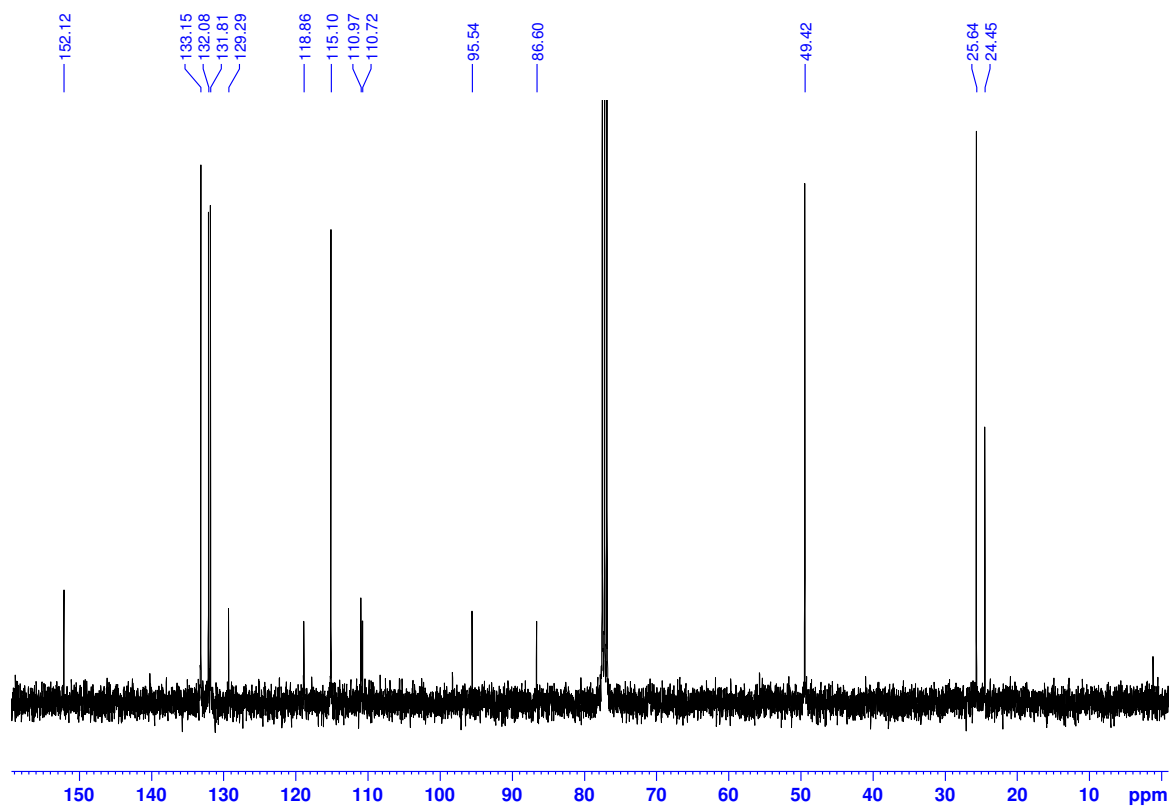

**Figure S10.** <sup>13</sup>C NMR spectrum of PIP-H (100 MHz, CDCl<sub>3</sub>).

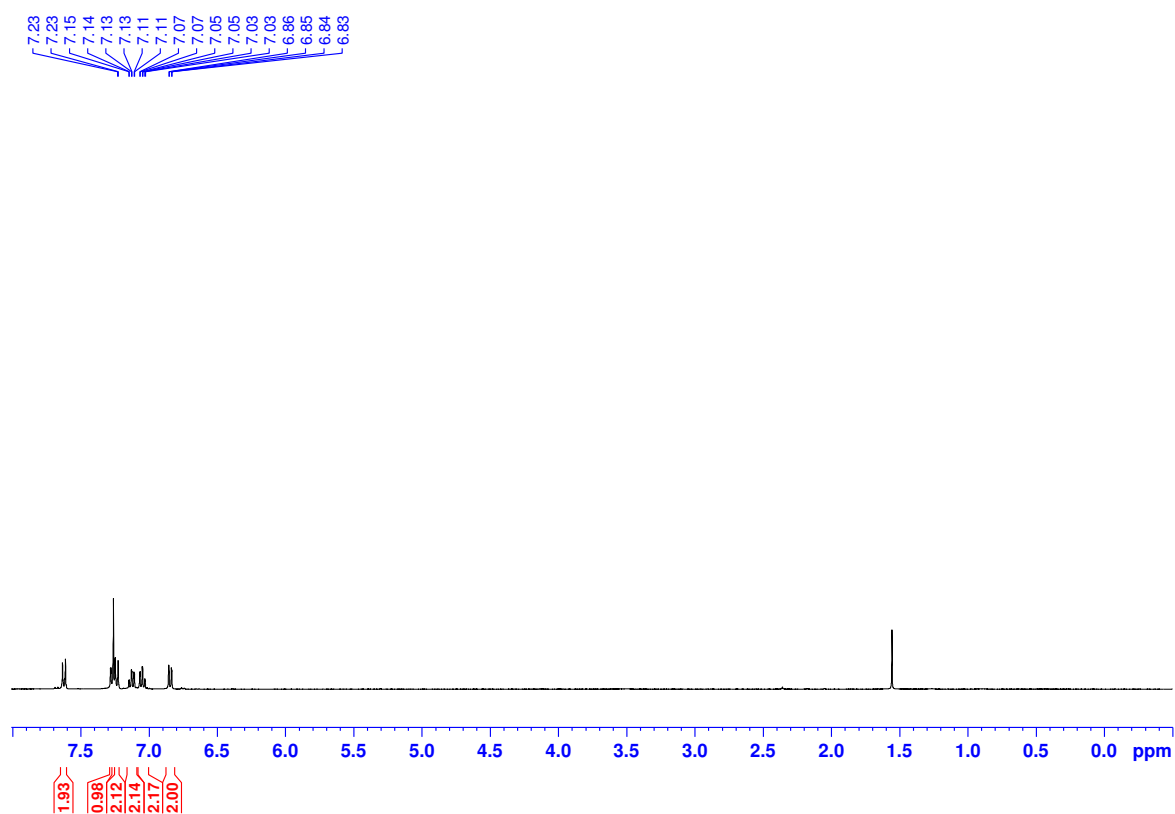

**Figure S11.** <sup>1</sup>H NMR spectrum of PTZ-F (400 MHz, CDCl<sub>3</sub>).

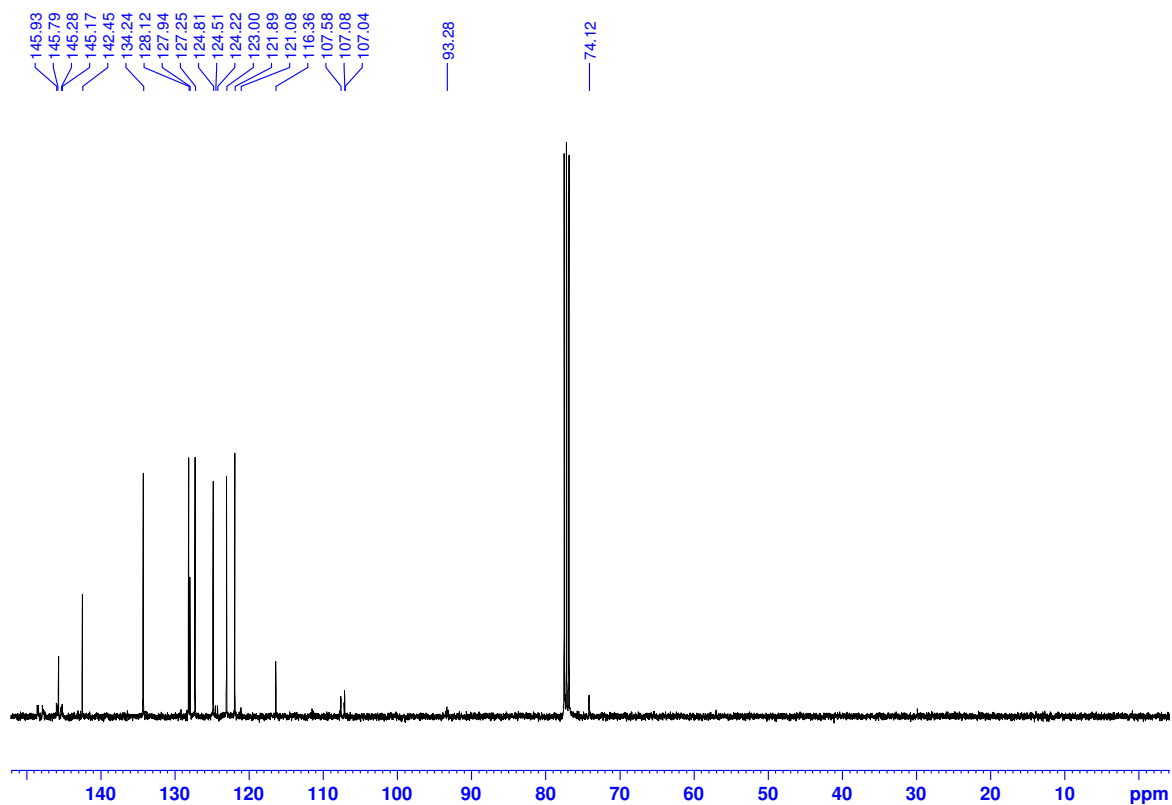

**Figure S12.** <sup>13</sup>C NMR spectrum of PTZ-F (100 MHz, CDCl<sub>3</sub>).

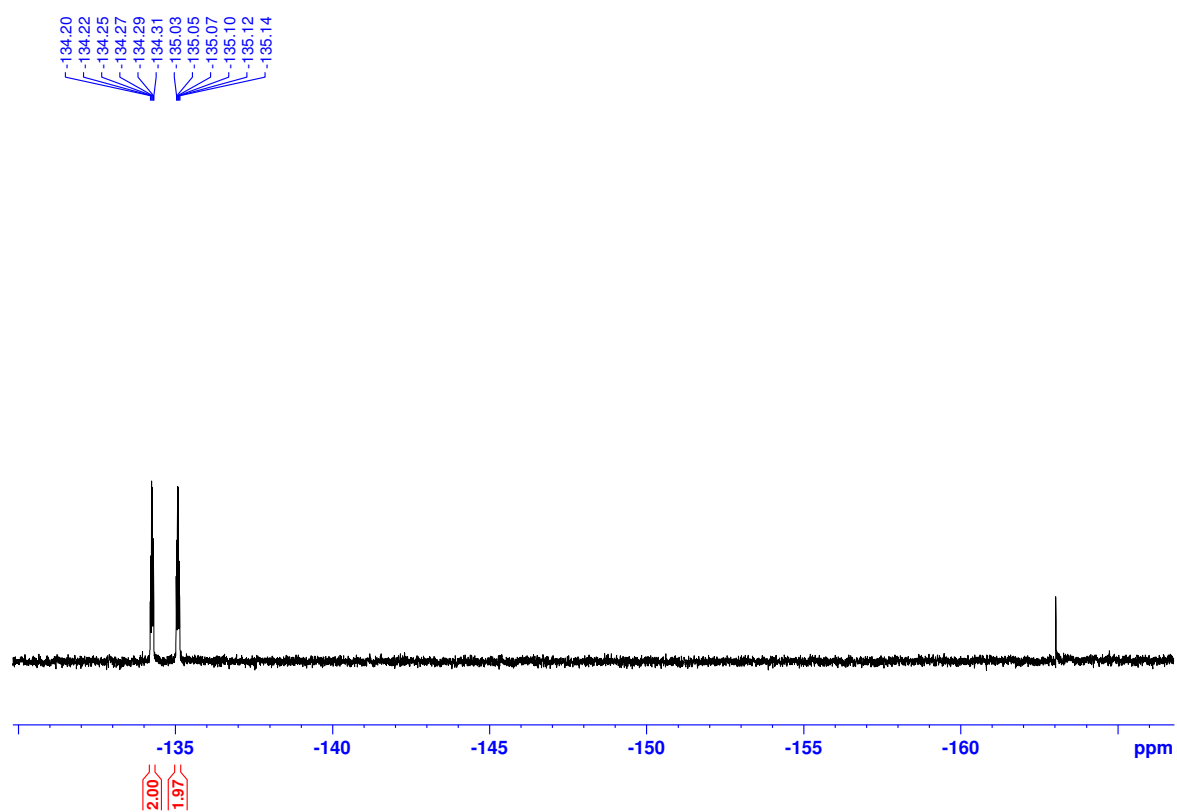

**Figure S13.**  $^{19}\text{F}$  NMR spectrum of PTZ-F (376 MHz,  $\text{CDCl}_3$ , hexafluorobenzene  $\delta_{\text{F}} = -163$  ppm).

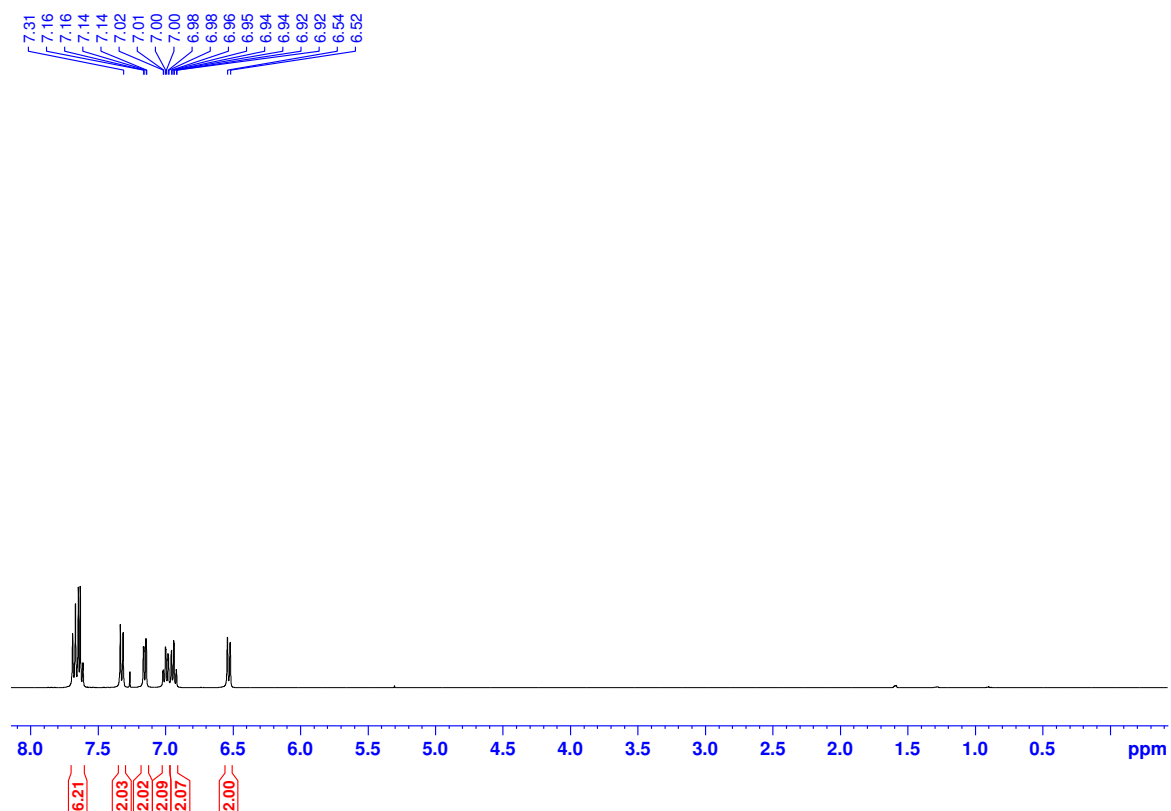

**Figure S14.**  $^1\text{H}$  NMR spectrum of PTZ-H (400 MHz,  $\text{CDCl}_3$ ).

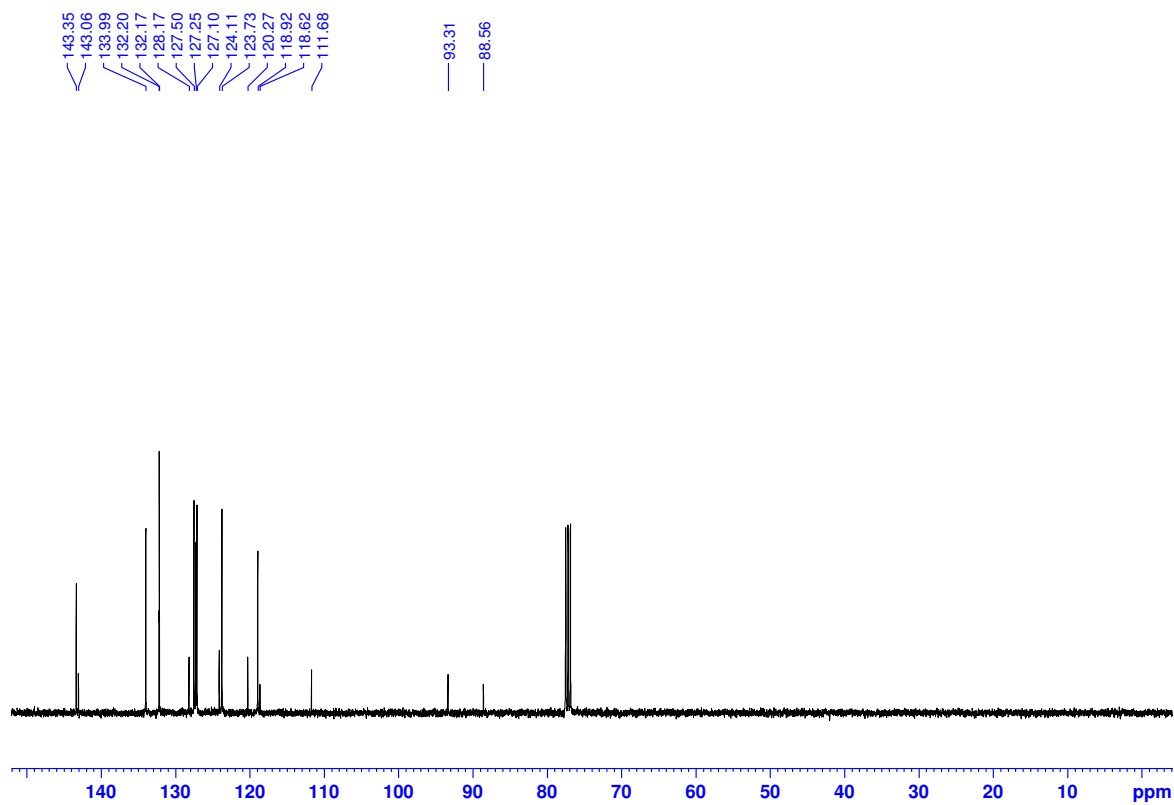

**Figure S15.**  $^{13}\text{C}$  NMR spectrum of PTZ-H (100 MHz,  $\text{CDCl}_3$ ).

### 3. X-ray Crystallographic Analysis

**Table S1.** Crystallographic data of **CBZ-H**, **PIP-F**, **PTZ-F**, **PTZ-H**.

|                                                     | <b>CBZ-H</b>                                   | <b>PIP-F</b>                                                  | <b>PTZ-F</b>                                                    | <b>PTZ-H</b>                                   |
|-----------------------------------------------------|------------------------------------------------|---------------------------------------------------------------|-----------------------------------------------------------------|------------------------------------------------|
| CCDC #                                              | 2151066                                        | 2151065                                                       | 215108                                                          | 2151067                                        |
| Empirical Formula                                   | C <sub>27</sub> H <sub>16</sub> N <sub>2</sub> | C <sub>20</sub> H <sub>14</sub> F <sub>4</sub> N <sub>2</sub> | C <sub>27</sub> H <sub>12</sub> F <sub>4</sub> N <sub>2</sub> S | C <sub>27</sub> H <sub>16</sub> N <sub>2</sub> |
| Formula weight                                      | 368.42                                         | 358.33                                                        | 472.45                                                          | 400.48                                         |
| Temperature [K]                                     | 298                                            | 297                                                           | 298                                                             | 100                                            |
| Crystal Color /<br>Habit                            | Colourless / block                             | Yellow / block                                                | Orange / Plate                                                  | Yellow / block                                 |
| Crystal Size [mm]                                   | 0.763 x 0.653 x 0.591                          | 0.42 x 0.375 x 0.27                                           | 0.501 x 0.323 x 0.201                                           | 0.857 x 0.71 x 0.663                           |
| Crystal System                                      | Monoclinic                                     | Triclinic                                                     | Monoclinic                                                      | Triclinic                                      |
| Space Group                                         | P 1 21/c 1                                     | P-1                                                           | C 1 2/c 1                                                       | P-1                                            |
| <i>a</i> [Å]                                        | 8,3951(4)                                      | 6.3026(3)                                                     | 8.464(2)                                                        | 9.4462(2)                                      |
| <i>b</i> [Å]                                        | 27.9304(11)                                    | 7.5073(3)                                                     | 25.149(5)                                                       | 11.9186(2)                                     |
| <i>c</i> [Å]                                        | 8.7047(5)                                      | 18.3949(7)                                                    | 10.370 (3)                                                      | 19.0135(4)                                     |
| $\alpha$ [°]                                        | 90                                             | 99.553(3)                                                     | 90                                                              | 83.182(2)                                      |
| $\beta$ [°]                                         | 106.182(5)                                     | 90.722(4)                                                     | 104.500(5)                                                      | 76.177(2)                                      |
| $\gamma$ [°]                                        | 90                                             | 94.046(4)                                                     | 90                                                              | 79.585(2)                                      |
| <i>V</i> [Å <sup>3</sup> ]                          | 1960.20(17)                                    | 855.89(6)                                                     | 2137.2(8)                                                       | 2038.00(7)                                     |
| <i>Z</i>                                            | 4                                              | 2                                                             | 4                                                               | 4                                              |
| <i>R</i> [F <sup>2</sup> > 2s(F <sup>2</sup> )] [a] | 0.0444                                         | 0.0529                                                        | 0.0508                                                          | 0.0362                                         |
| <i>wR</i> <sub>2</sub> (F <sup>2</sup> ) [b]        | 0.1162                                         | 0.1739                                                        | 0.1478                                                          | 0.0962                                         |

[a]  $R = \sum ||F_o| - |F_c|| / \sum |F_o|$ . [b]  $wR = \{[\sum w(|F_o| - |F_c|)] / \sum w|F_o|\}^{1/2}$ .

### 4. DFT calculation

**Table S2.** Dipole moment (debye) of all derivatives at franck-condon state.

|              | Dipole moment (debye)                                 |
|--------------|-------------------------------------------------------|
| <b>CBZ-F</b> | X = 0.0000 / Y = 0.0000 / Z = -27.3303 Tot = 27.3303  |
| <b>CBZ-H</b> | X = 0.0000 / Y = 0.0000 / Z = -19.4571 Tot = 19.4571  |
| <b>PIP-F</b> | X = -28.6317 / Y = -0.1896 / Z = 0.5683 Tot = 28.6379 |
| <b>PIP-H</b> | X = -25.9340 / Y = 0.1709 / Z = -0.5371 Tot = 25.9401 |
| <b>PTZ-F</b> | X = -37.1484 / Y = 0.0000 / Z = -1.3418 Tot = 37.1726 |
| <b>PTZ-H</b> | X = 29.1970 / Y = 0.0000 / Z = -1.3936 Tot = 29.2302  |

**Table S3.** Cartesian coordinate for **CBZ-F** at the optimized geometry in  $S_0$  state.

| No. | Atom | Type | Coordinates (Angstroms) |           |           | 23 | 6 | 0 | -8.470498 | 0         | 0         |
|-----|------|------|-------------------------|-----------|-----------|----|---|---|-----------|-----------|-----------|
|     |      |      | X                       | Y         | Z         | 24 | 7 | 0 | -9.627056 | 0         | 0         |
| 1   | 6    | 0    | -6.325002               | -1.009219 | 0.648346  | 25 | 6 | 0 | 4.862922  | 1.087669  | 0.316647  |
| 2   | 6    | 0    | -4.942223               | -1.007255 | 0.647257  | 26 | 6 | 0 | 4.862922  | -1.087669 | -0.316647 |
| 3   | 6    | 0    | -4.216086               | 0         | 0         | 27 | 6 | 0 | 4.503792  | 2.372292  | 0.734615  |
| 4   | 6    | 0    | -4.942223               | 1.007255  | -0.647257 | 28 | 6 | 0 | 6.215361  | 0.695691  | 0.203416  |
| 5   | 6    | 0    | -6.325002               | 1.009219  | -0.648346 | 29 | 6 | 0 | 4.503792  | -2.372292 | -0.734615 |
| 6   | 6    | 0    | -7.040324               | 0         | 0         | 30 | 6 | 0 | 6.215361  | -0.695691 | -0.203416 |
| 7   | 6    | 0    | -2.796471               | 0         | 0         | 31 | 6 | 0 | 5.531504  | 3.266336  | 1.01484   |
| 8   | 9    | 0    | -4.29625                | 1.986908  | -1.27572  | 32 | 1 | 0 | 3.465308  | 2.665456  | 0.844371  |
| 9   | 9    | 0    | -6.977627               | 1.983993  | -1.273584 | 33 | 6 | 0 | 7.230947  | 1.612967  | 0.491131  |
| 10  | 9    | 0    | -6.977627               | -1.983993 | 1.273584  | 34 | 6 | 0 | 5.531504  | -3.266336 | -1.01484  |
| 11  | 9    | 0    | -4.29625                | -1.986908 | 1.27572   | 35 | 1 | 0 | 3.465308  | -2.665456 | -0.844371 |
| 12  | 6    | 0    | -0.154951               | 0         | 0         | 36 | 6 | 0 | 7.230947  | -1.612967 | -0.491131 |
| 13  | 6    | 0    | 0.55094                 | -0.996546 | 0.692781  | 37 | 6 | 0 | 6.882416  | 2.897613  | 0.890871  |
| 14  | 6    | 0    | 0.55094                 | 0.996546  | -0.692781 | 38 | 1 | 0 | 5.280976  | 4.271304  | 1.339318  |
| 15  | 6    | 0    | 1.938897                | -0.990548 | 0.699584  | 39 | 1 | 0 | 8.274083  | 1.322589  | 0.407523  |
| 16  | 1    | 0    | 0.006169                | -1.762129 | 1.234675  | 40 | 6 | 0 | 6.882416  | -2.897613 | -0.890871 |
| 17  | 6    | 0    | 1.938897                | 0.990548  | -0.699584 | 41 | 1 | 0 | 5.280976  | -4.271304 | -1.339318 |
| 18  | 1    | 0    | 0.006169                | 1.762129  | -1.234675 | 42 | 1 | 0 | 8.274083  | -1.322589 | -0.407523 |
| 19  | 6    | 0    | 2.636173                | 0         | 0         | 43 | 1 | 0 | 7.65736   | 3.62258   | 1.116393  |
| 20  | 1    | 0    | 2.488065                | -1.74289  | 1.256244  | 44 | 1 | 0 | 7.65736   | -3.62258  | -1.116393 |
| 21  | 1    | 0    | 2.488065                | 1.74289   | -1.256244 | 45 | 7 | 0 | 4.04854   | 0         | 0         |
| 22  | 6    | 0    | -1.584369               | 0         | 0         |    |   |   |           |           |           |

**Table S4.** Cartesian coordinate for **CBZ-H** at the optimized geometry in S<sub>0</sub> state.

| No. | Atom | Type | Coordinates (Angstroms) |           |           | 23 | 6 | 0 | -0.825617 | -0.886699 | -0.999403 |
|-----|------|------|-------------------------|-----------|-----------|----|---|---|-----------|-----------|-----------|
|     |      |      | X                       | Y         | Z         |    |   |   |           |           |           |
| 1   | 6    | 0    | -3.01277                | 0.347214  | -5.942111 | 25 | 6 | 0 | -0.832644 | -0.88045  | 0.3893    |
| 2   | 6    | 0    | -3.396685               | 0.400768  | -4.590574 | 26 | 1 | 0 | -1.449757 | -1.584456 | -1.548507 |
| 3   | 6    | 0    | -2.465286               | 0.288705  | -3.564068 | 27 | 6 | 0 | 0.832644  | 0.88045   | 0.3893    |
| 4   | 6    | 0    | -1.126064               | 0.114147  | -3.924988 | 28 | 1 | 0 | 1.449757  | 1.584456  | -1.548507 |
| 5   | 6    | 0    | -0.721042               | 0.073694  | -5.278095 | 29 | 6 | 0 | 0         | 0         | 1.098643  |
| 6   | 6    | 0    | -1.67717                | 0.188847  | -6.292427 | 30 | 1 | 0 | -1.472512 | -1.567174 | 0.933035  |
| 7   | 1    | 0    | -3.76772                | 0.436392  | -6.716162 | 31 | 1 | 0 | 1.472512  | 1.567174  | 0.933035  |
| 8   | 1    | 0    | -4.443951               | 0.535259  | -4.339153 | 32 | 6 | 0 | 0         | 0         | 2.530448  |
| 9   | 1    | 0    | -2.771223               | 0.340627  | -2.524681 | 33 | 6 | 0 | 0         | 0         | 3.743746  |
| 10  | 1    | 0    | -1.37822                | 0.158907  | -7.336067 | 34 | 6 | 0 | 0         | 0         | 5.174825  |
| 11  | 6    | 0    | 1.126064                | -0.114147 | -3.924988 | 35 | 6 | 0 | -0.841527 | -0.876297 | 5.880753  |
| 12  | 6    | 0    | 2.465286                | -0.288705 | -3.564068 | 36 | 6 | 0 | 0.841527  | 0.876297  | 5.880753  |
| 13  | 6    | 0    | 3.396685                | -0.400768 | -4.590574 | 37 | 6 | 0 | -0.843185 | -0.877966 | 7.267964  |
| 14  | 6    | 0    | 3.01277                 | -0.347214 | -5.942111 | 38 | 1 | 0 | -1.490184 | -1.551808 | 5.334316  |
| 15  | 6    | 0    | 1.67717                 | -0.188847 | -6.292427 | 39 | 6 | 0 | 0.843185  | 0.877966  | 7.267964  |
| 16  | 6    | 0    | 0.721042                | -0.073694 | -5.278095 | 40 | 1 | 0 | 1.490184  | 1.551808  | 5.334316  |
| 17  | 1    | 0    | 2.771223                | -0.340627 | -2.524681 | 41 | 6 | 0 | 0         | 0         | 7.961301  |
| 18  | 1    | 0    | 4.443951                | -0.535259 | -4.339153 | 42 | 1 | 0 | -1.491441 | -1.553038 | 7.815425  |
| 19  | 1    | 0    | 3.76772                 | -0.436392 | -6.716162 | 43 | 1 | 0 | 1.491441  | 1.553038  | 7.815425  |
| 20  | 1    | 0    | 1.37822                 | -0.158907 | -7.336067 | 44 | 6 | 0 | 0         | 0         | 9.400583  |
| 21  | 7    | 0    | 0                       | 0         | -3.111426 | 45 | 7 | 0 | 0         | 0         | 10.558887 |
| 22  | 6    | 0    | 0                       | 0         | -1.697023 |    |   |   |           |           |           |

**Table S5.** Cartesian coordinate for **PIP-F** at the optimized geometry in  $S_0$  state.

| No. | Atom | Type | Coordinates (Angstroms) |           |           | 20 | 1 | 0 | -3.765713 | -2.136335 | 0.208937  |
|-----|------|------|-------------------------|-----------|-----------|----|---|---|-----------|-----------|-----------|
|     |      |      | X                       | Y         | Z         |    |   |   |           |           |           |
| 1   | 6    | 0    | -7.517135               | -1.077746 | -0.618561 | 21 | 6 | 0 | -1.860094 | 1.204299  | -0.198644 |
| 2   | 6    | 0    | -6.055852               | 1.053701  | 0.674743  | 22 | 1 | 0 | -3.759416 | 2.145031  | -0.367267 |
| 3   | 6    | 0    | -7.484705               | 1.278818  | 0.194916  | 23 | 6 | 0 | -1.142974 | 0.001812  | -0.051522 |
| 4   | 6    | 0    | -8.265659               | -0.033497 | 0.20611   | 24 | 1 | 0 | -1.328854 | -2.129376 | 0.206148  |
| 5   | 1    | 0    | -7.499275               | -0.769414 | -1.671158 | 25 | 1 | 0 | -1.319395 | 2.137817  | -0.317672 |
| 6   | 1    | 0    | -8.017856               | -2.049868 | -0.569467 | 26 | 6 | 0 | 0.281481  | 0.000442  | -0.039176 |
| 7   | 1    | 0    | -6.069911               | 0.725386  | 1.729597  | 27 | 6 | 0 | 1.495664  | 0.001375  | -0.027699 |
| 8   | 1    | 0    | -5.496323               | 1.986784  | 0.632243  | 28 | 6 | 0 | 2.912724  | 0.000962  | -0.013131 |
| 9   | 1    | 0    | -7.959621               | 2.024437  | 0.84048   | 29 | 6 | 0 | 3.640869  | -1.195026 | 0.041855  |
| 10  | 1    | 0    | -7.459247               | 1.687916  | -0.822661 | 30 | 6 | 0 | 3.642846  | 1.196357  | -0.052251 |
| 11  | 1    | 0    | -8.36565                | -0.387286 | 1.241388  | 31 | 6 | 0 | 5.022887  | -1.197905 | 0.056662  |
| 12  | 1    | 0    | -9.277314               | 0.112771  | -0.184643 | 32 | 6 | 0 | 5.024857  | 1.198067  | -0.036698 |
| 13  | 6    | 0    | -6.078087               | -1.247754 | -0.135963 | 33 | 6 | 0 | 5.740979  | -0.00021  | 0.017879  |
| 14  | 1    | 0    | -5.556278               | -1.930762 | -0.809517 | 34 | 7 | 0 | -5.371361 | 0.031981  | -0.132139 |
| 15  | 1    | 0    | -6.072061               | -1.696803 | 0.874212  | 35 | 6 | 0 | 7.170368  | -0.000747 | 0.033646  |
| 16  | 6    | 0    | -3.979061               | 0.006281  | -0.075767 | 36 | 7 | 0 | 8.327089  | -0.001213 | 0.046426  |
| 17  | 6    | 0    | -3.251951               | -1.193203 | 0.07488   | 37 | 9 | 0 | 2.998153  | 2.360976  | -0.104582 |
| 18  | 6    | 0    | -3.241687               | 1.205642  | -0.212742 | 38 | 9 | 0 | 5.678389  | 2.355829  | -0.073419 |
| 19  | 6    | 0    | -1.863802               | -1.193176 | 0.081409  | 39 | 9 | 0 | 5.674461  | -2.356232 | 0.107891  |
|     |      |      |                         |           |           | 40 | 9 | 0 | 2.994198  | -2.359089 | 0.080076  |

**Table S6.** Cartesian coordinate for **PIP-H** at the optimized geometry in S<sub>0</sub> state.

| No. | Atom | Type | Coordinates (Angstroms) |           |           | 20 | 6 | 0 | -1.126057 | -1.115214 | -0.454796 |
|-----|------|------|-------------------------|-----------|-----------|----|---|---|-----------|-----------|-----------|
|     |      |      | X                       | Y         | Z         |    |   |   |           |           |           |
| 1   | 6    | 0    | -5.659684               | 1.053212  | 1.227757  | 21 | 1 | 0 | -3.025086 | -2.045457 | -0.596059 |
| 2   | 6    | 0    | -5.374555               | 1.276221  | -0.26085  | 22 | 6 | 0 | -1.08791  | 1.2877    | -0.427553 |
| 3   | 6    | 0    | -5.372088               | -1.084007 | -0.70431  | 23 | 1 | 0 | -2.951647 | 2.281619  | -0.588025 |
| 4   | 6    | 0    | -5.657182               | -1.433762 | 0.759615  | 24 | 6 | 0 | -0.383182 | 0.072802  | -0.382166 |
| 5   | 6    | 0    | -6.398509               | -0.27407  | 1.436245  | 25 | 1 | 0 | -0.611067 | -2.069933 | -0.410226 |
| 6   | 1    | 0    | -6.317721               | 1.319423  | -0.818288 | 26 | 1 | 0 | -0.54058  | 2.223729  | -0.373245 |
| 7   | 1    | 0    | -4.865234               | 2.22215   | -0.436118 | 27 | 6 | 0 | 1.038999  | 0.048311  | -0.26087  |
| 8   | 1    | 0    | -4.705021               | 1.040107  | 1.770484  | 28 | 6 | 0 | 2.249731  | 0.027542  | -0.157795 |
| 9   | 1    | 0    | -6.248433               | 1.888564  | 1.621143  | 29 | 6 | 0 | 3.673466  | 0.003926  | -0.036701 |
| 10  | 1    | 0    | -6.319539               | -0.912073 | -1.229104 | 30 | 6 | 0 | 4.361638  | -1.221749 | 0.009169  |
| 11  | 1    | 0    | -4.865742               | -1.889519 | -1.236909 | 31 | 6 | 0 | 4.398541  | 1.206666  | 0.038098  |
| 12  | 1    | 0    | -6.247003               | -2.354672 | 0.814583  | 32 | 6 | 0 | 5.743288  | -1.24646  | 0.126799  |
| 13  | 1    | 0    | -4.707226               | -1.620578 | 1.277105  | 33 | 1 | 0 | 3.803802  | -2.149842 | -0.04849  |
| 14  | 1    | 0    | -7.404115               | -0.192793 | 1.000763  | 34 | 6 | 0 | 5.780228  | 1.186666  | 0.155768  |
| 15  | 1    | 0    | -6.528936               | -0.474934 | 2.504221  | 35 | 1 | 0 | 3.869263  | 2.152419  | 0.002815  |
| 16  | 7    | 0    | -4.601232               | 0.156699  | -0.810517 | 36 | 6 | 0 | 6.45415   | -0.041107 | 0.200195  |
| 17  | 6    | 0    | -3.225453               | 0.122398  | -0.627524 | 37 | 1 | 0 | 6.273941  | -2.191572 | 0.16219   |
| 18  | 6    | 0    | -2.507703               | -1.095623 | -0.56748  | 38 | 1 | 0 | 6.339445  | 2.114035  | 0.213431  |
| 19  | 6    | 0    | -2.466874               | 1.315167  | -0.544033 | 39 | 6 | 0 | 7.887256  | -0.064395 | 0.321609  |
|     |      |      |                         |           |           | 40 | 7 | 0 | 9.041559  | -0.083272 | 0.419468  |

**Table S7.** Cartesian coordinate for **PTZ-F** at the optimized geometry in  $S_0$  state.

| No. | Atom | Type | Coordinates (Angstroms) |           |           | 23 | 6 | 0 | -2.329554 | 0         | 0.145108  |
|-----|------|------|-------------------------|-----------|-----------|----|---|---|-----------|-----------|-----------|
|     |      |      | X                       | Y         | Z         |    |   |   |           |           |           |
| 1   | 6    | 0    | -4.419673               | -3.56341  | -0.717872 | 24 | 6 | 0 | -1.618145 | -0.000004 | 1.342712  |
| 2   | 6    | 0    | -3.742406               | -2.363864 | -0.502946 | 25 | 6 | 0 | -1.654138 | 0.000004  | -1.07885  |
| 3   | 6    | 0    | -4.425555               | -1.230246 | -0.042475 | 26 | 6 | 0 | -0.226919 | -0.000004 | 1.325254  |
| 4   | 6    | 0    | -5.803565               | -1.342225 | 0.208168  | 27 | 1 | 0 | -2.162925 | -0.000007 | 2.281121  |
| 5   | 6    | 0    | -6.481074               | -2.532582 | -0.046049 | 28 | 6 | 0 | -0.266275 | 0.000004  | -1.105155 |
| 6   | 6    | 0    | -5.791684               | -3.654155 | -0.503065 | 29 | 1 | 0 | -2.222587 | 0.000007  | -2.004554 |
| 7   | 6    | 0    | -5.803566               | 1.342223  | 0.208175  | 30 | 6 | 0 | 0.455838  | 0         | 0.100283  |
| 8   | 6    | 0    | -4.425555               | 1.230246  | -0.042468 | 31 | 1 | 0 | 0.334112  | -0.000006 | 2.253495  |
| 9   | 6    | 0    | -3.742407               | 2.363867  | -0.502933 | 32 | 1 | 0 | 0.265585  | 0.000007  | -2.050428 |
| 10  | 1    | 0    | -2.675741               | 2.320027  | -0.684965 | 33 | 6 | 0 | 1.886614  | 0         | 0.0771    |
| 11  | 6    | 0    | -4.419675               | 3.563414  | -0.717852 | 34 | 6 | 0 | 3.098077  | 0         | 0.05813   |
| 12  | 6    | 0    | -5.791686               | 3.654157  | -0.503045 | 35 | 6 | 0 | 4.518134  | 0         | 0.038568  |
| 13  | 6    | 0    | -6.481075               | 2.532581  | -0.046035 | 36 | 6 | 0 | 5.227734  | 0.000001  | -1.168314 |
| 14  | 1    | 0    | -3.861529               | -4.426791 | -1.064976 | 37 | 6 | 0 | 5.259273  | 0         | 1.226362  |
| 15  | 1    | 0    | -2.67574                | -2.320022 | -0.684978 | 38 | 6 | 0 | 6.610517  | 0         | -1.188728 |
| 16  | 1    | 0    | -7.549854               | -2.58011  | 0.139955  | 39 | 6 | 0 | 6.642091  | -0.000001 | 1.21045   |
| 17  | 1    | 0    | -6.321463               | -4.583483 | -0.681271 | 40 | 6 | 0 | 7.34112   | 0         | 0.001474  |
| 18  | 1    | 0    | -3.861531               | 4.426797  | -1.064951 | 41 | 6 | 0 | 8.771302  | 0         | -0.017331 |
| 19  | 1    | 0    | -6.321465               | 4.583486  | -0.681246 | 42 | 7 | 0 | 9.927706  | 0         | -0.032659 |
| 20  | 1    | 0    | -7.549855               | 2.580107  | 0.139969  | 43 | 9 | 0 | 4.62853   | -0.000001 | 2.398222  |
| 21  | 7    | 0    | -3.76276                | 0         | 0.198459  | 44 | 9 | 0 | 7.309798  | -0.000001 | 2.359608  |
| 22  | 16   | 0    | -6.665709               | -0.000003 | 0.97962   | 45 | 9 | 0 | 7.247877  | 0.000001  | -2.355031 |
|     |      |      |                         |           |           | 46 | 9 | 0 | 4.566377  | 0.000001  | -2.323207 |

**Table S8.** Cartesian coordinate for **PTZ-H** at the optimized geometry in  $S_0$  state.

| No. | Atom | Type | Coordinates (Angstroms) |           |           | 23 | 6 | 0 | 1.416349   | 0.001726  | 0.147358  |
|-----|------|------|-------------------------|-----------|-----------|----|---|---|------------|-----------|-----------|
|     |      |      | X                       | Y         | Z         |    |   |   |            |           |           |
| 1   | 6    | 0    | 3.511218                | 3.567265  | -0.700187 | 24 | 6 | 0 | 0.705631   | -0.010972 | 1.344988  |
| 2   | 6    | 0    | 2.83241                 | 2.367952  | -0.489132 | 25 | 6 | 0 | 0.737776   | 0.013644  | -1.074455 |
| 3   | 6    | 0    | 3.514764                | 1.230294  | -0.037007 | 26 | 6 | 0 | -0.686037  | -0.011711 | 1.328831  |
| 4   | 6    | 0    | 4.893709                | 1.339196  | 0.210681  | 27 | 1 | 0 | 1.251142   | -0.020579 | 2.283116  |
| 5   | 6    | 0    | 5.572728                | 2.529483  | -0.039957 | 28 | 6 | 0 | -0.650489  | 0.013688  | -1.097613 |
| 6   | 6    | 0    | 4.884141                | 3.654594  | -0.489441 | 29 | 1 | 0 | 1.30409    | 0.022807  | -2.001608 |
| 7   | 6    | 0    | 4.88958                 | -1.345151 | 0.198925  | 30 | 6 | 0 | -1.37475   | 0.000825  | 0.106899  |
| 8   | 6    | 0    | 3.511179                | -1.229322 | -0.048378 | 31 | 1 | 0 | -1.244476  | -0.02179  | 2.2587    |
| 9   | 6    | 0    | 2.825238                | -2.360122 | -0.512125 | 32 | 1 | 0 | -1.182754  | 0.023175  | -2.042737 |
| 10  | 1    | 0    | 1.758297                | -2.312808 | -0.691702 | 33 | 6 | 0 | -2.807297  | 0.000458  | 0.085385  |
| 11  | 6    | 0    | 3.499978                | -3.559822 | -0.7337   | 34 | 6 | 0 | -4.020147  | 0.00026   | 0.06715   |
| 12  | 6    | 0    | 4.872374                | -3.653977 | -0.522354 | 35 | 6 | 0 | -5.451416  | 0.000193  | 0.047944  |
| 13  | 6    | 0    | 5.564612                | -2.535459 | -0.062149 | 36 | 6 | 0 | -6.141125  | 0.043818  | -1.175296 |
| 14  | 1    | 0    | 2.95349                 | 4.433408  | -1.041114 | 37 | 6 | 0 | -6.172356  | -0.043439 | 1.253029  |
| 15  | 1    | 0    | 1.765112                | 2.326358  | -0.667816 | 38 | 6 | 0 | -7.528271  | 0.0441    | -1.195473 |
| 16  | 1    | 0    | 6.642147                | 2.574143  | 0.143166  | 39 | 6 | 0 | -7.559524  | -0.043419 | 1.237634  |
| 17  | 1    | 0    | 5.415078                | 4.58381   | -0.664822 | 40 | 6 | 0 | -8.23679   | 0.000481  | 0.012189  |
| 18  | 1    | 0    | 2.939569                | -4.420762 | -1.083295 | 41 | 6 | 0 | -9.675985  | 0.000856  | -0.006205 |
| 19  | 1    | 0    | 5.400155                | -4.583449 | -0.705726 | 42 | 7 | 0 | -10.834153 | 0.001176  | -0.021042 |
| 20  | 1    | 0    | 6.633756                | -2.585532 | 0.121153  | 43 | 1 | 0 | -5.637927  | -0.077348 | 2.195858  |
| 21  | 7    | 0    | 2.850255                | 0.000361  | 0.19793   | 44 | 1 | 0 | -8.119074  | -0.077177 | 2.165805  |
| 22  | 16   | 0    | 5.755622                | -0.007698 | 0.974337  | 45 | 1 | 0 | -8.063692  | 0.077907  | -2.137777 |
|     |      |      |                         |           |           | 46 | 1 | 0 | -5.582591  | 0.077604  | -2.104057 |

## 5. Photophysical Characteristics

(a) CBZ-F

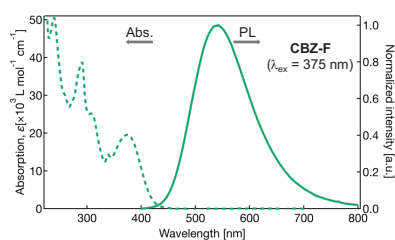

(b) PIP-F

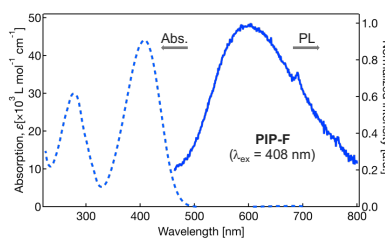

(c) PTZ-F

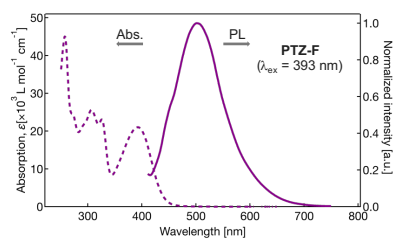

(d) CBZ-H

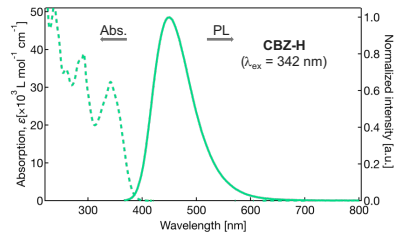

(e) PIP-H

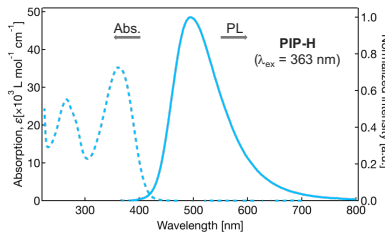

(f) PTZ-H

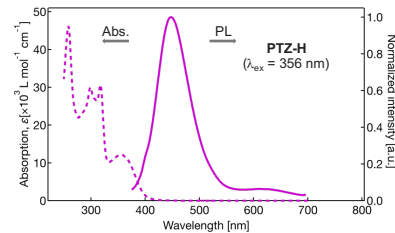

**Figure S16.** UV-vis and PL spectra of all derivatives in  $\text{CH}_2\text{Cl}_2$  solution. Concentration:  $1.0 \times 10^{-5} \text{ mol L}^{-1}$  for UV-vis and PL.

(a) CBZ-F

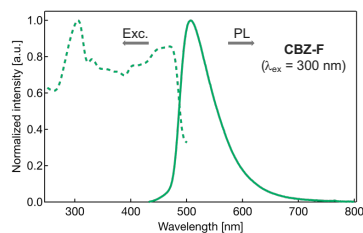

(b) PIP-F

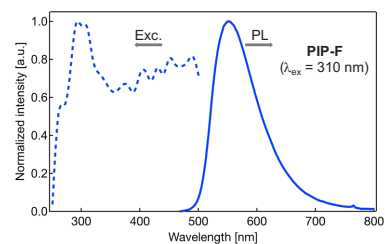

(c) PTZ-F

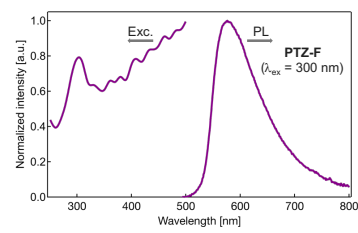

(d) CBZ-H

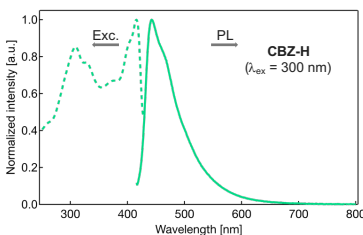

(e) PIP-H

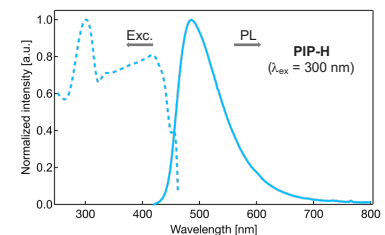

(f) PTZ-H

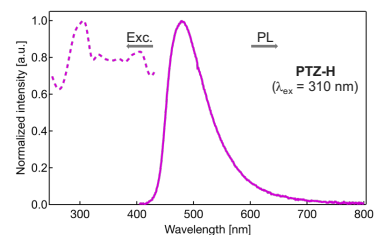

**Figure S17.** Excitation and PL spectra of all derivatives in crystalline state. Excitation spectra were obtained by monitoring PL at the maximum wavelength.

(a) CBZ-F

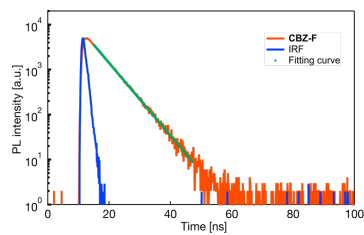

(b) PIP-F

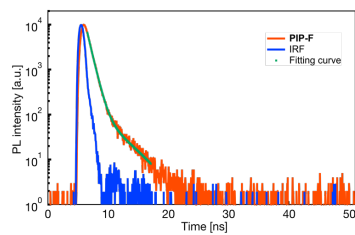

(c) PTZ-F

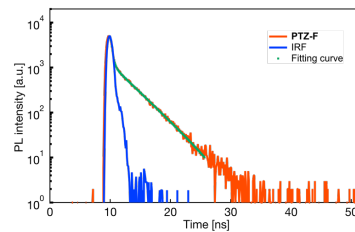

(d) CBZ-H

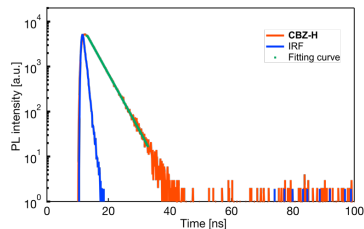

(e) PIP-H

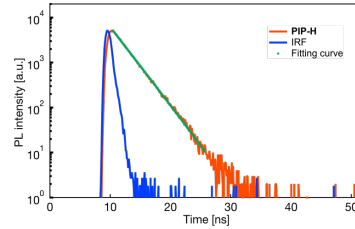

(f) PTZ-H

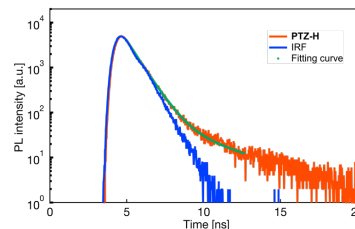

**Figure S18.** PL decay curve of all derivatives in  $\text{CH}_2\text{Cl}_2$  solution. They were measured by monitoring PL at maximum wavelength ( $\lambda_{\text{PL}} = 542$  nm for **CBZ-F**, 447 nm for **CBZ-H**, 603 nm for **PIP-F**, 496 nm for **PIP-H**, 501 nm for **PTZ-F**, 447 nm for **PTZ-H**). Concentration:  $1.0 \times 10^{-5}$  mol  $\text{L}^{-1}$ .

(a) CBZ-F

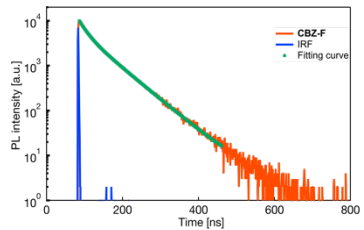

(b) PIP-F

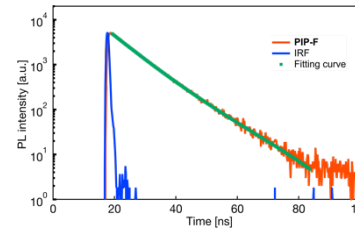

(c) PTZ-F

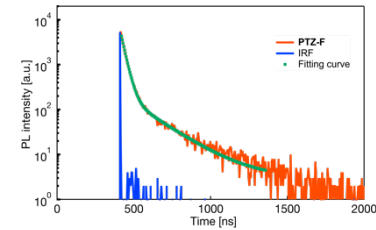

(d) CBZ-H

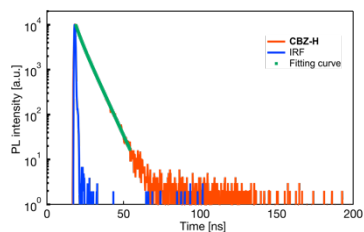

(e) PIP-H

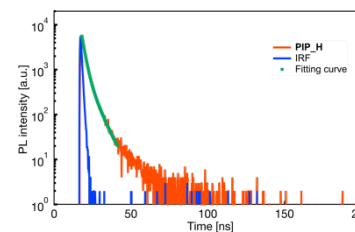

(f) PTZ-H

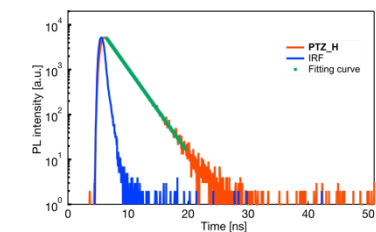

**Figure S19.** PL decay curve of all derivatives in crystalline state. They were measured by monitoring PL at maximum wavelength ( $\lambda_{\text{PL}} = 507$  nm for **CBZ-F**, 442 nm for **CBZ-H**, 551 nm for **PIP-F**, 485 nm for **PIP-H**, 575 nm for **PTZ-F**, 478 nm for **PTZ-H**).

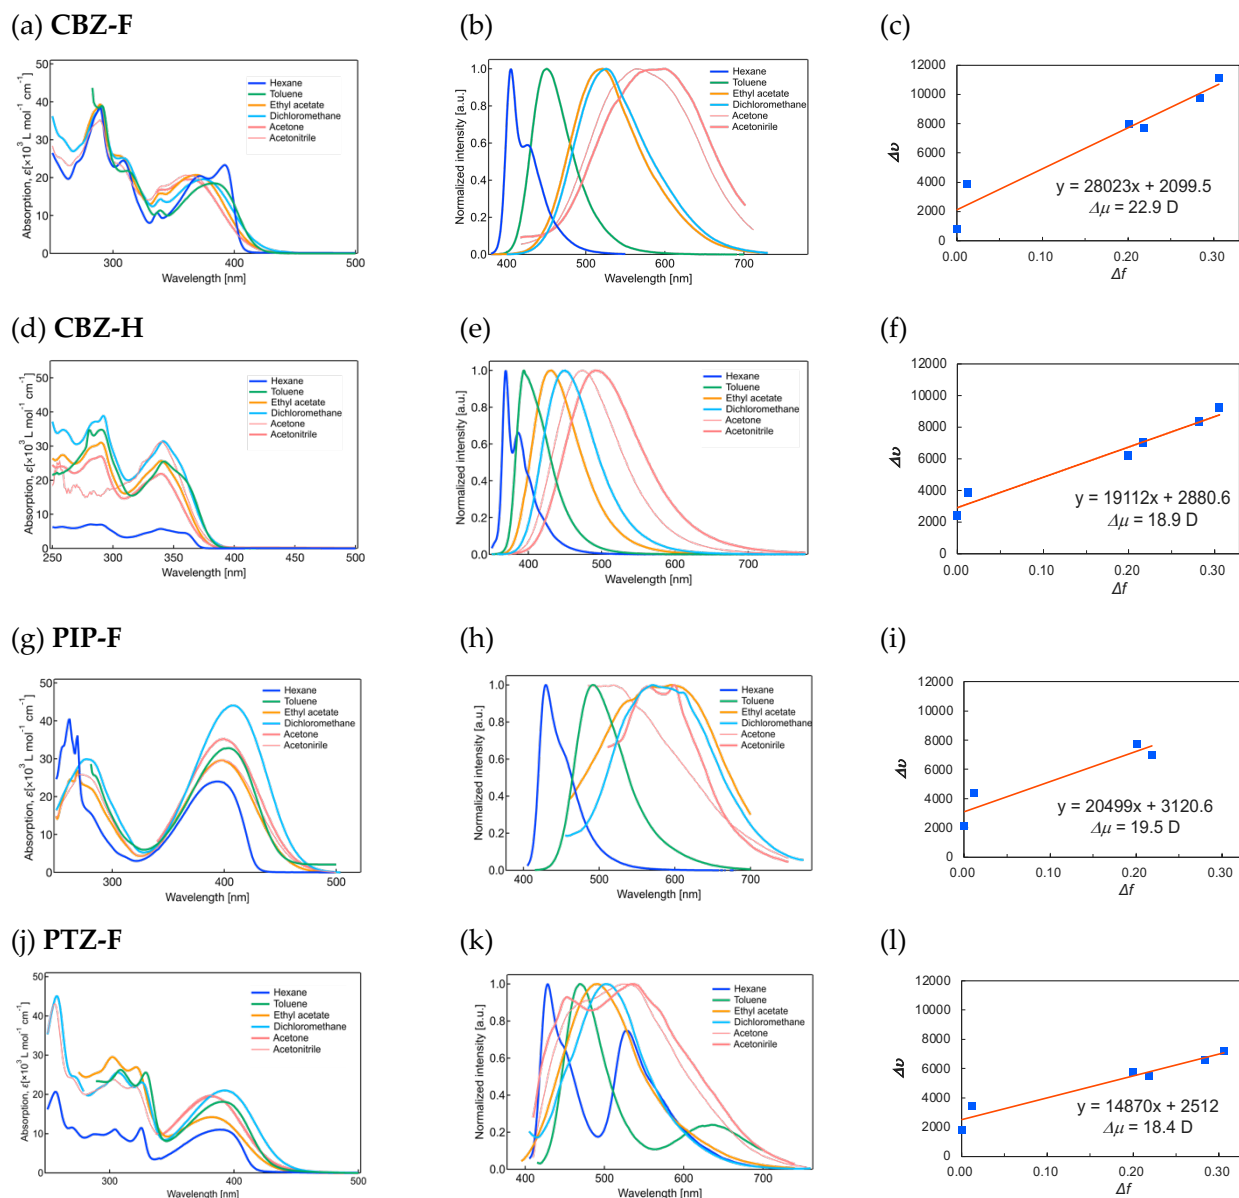

**Figure S20.** UV-vis and PL spectra of **CBZ-F**, **CBZ-H**, **PIP-F**, **PTZ-F** in various solvents. Concentration:  $1.0 \times 10^{-5}$  mol L<sup>-1</sup> for UV-vis and PL. Lippert-Mataga plot of **CBZ-F**, **CBZ-H**, **PIP-F**, **PTZ-F**.

**Table S9.** Photophysical properties of **CBZ-F** in various solvents.

| Solvent         | $\lambda_{\text{abs}}$ [nm] | $\lambda_{\text{PL}}$ [nm] | $\Phi_{\text{PL}}$ |
|-----------------|-----------------------------|----------------------------|--------------------|
| Hexane          | 392                         | 405                        | 0.85               |
| Toluene         | 383                         | 450                        | 0.92               |
| Ethyl acetate   | 368                         | 521                        | 0.55               |
| Dichloromethane | 375                         | 526                        | 0.65               |
| Acetone         | 364                         | 564                        | 0.03               |
| Acetonitrile    | 360                         | 580                        | 0.01               |

**Table S10.** Photophysical properties of **CBZ-H** in various solvents.

| Solvent         | $\lambda_{\text{abs}}$ [nm] | $\lambda_{\text{PL}}$ [nm] | $\Phi_{\text{PL}}$ |
|-----------------|-----------------------------|----------------------------|--------------------|
| Hexane          | 339                         | 369                        | 0.8                |
| Toluene         | 342                         | 394                        | 0.95               |
| Ethyl acetate   | 340                         | 430                        | 0.99               |
| Dichloromethane | 341                         | 447                        | 1.0                |
| Acetone         | 340                         | 473                        | 0.77               |
| Acetonitrile    | 340                         | 494                        | 0.82               |

**Table S11.** Photophysical properties of **PIP-F** in various solvents.

| Solvent         | $\lambda_{\text{abs}}$ [nm] | $\lambda_{\text{PL}}$ [nm] | $\Phi_{\text{PL}}$ |
|-----------------|-----------------------------|----------------------------|--------------------|
| Hexane          | 394                         | 430                        | 0.47               |
| Toluene         | 404                         | 491                        | 0.37               |
| Ethyl acetate   | 398                         | 577                        | 0.01               |
| Dichloromethane | 408                         | 572                        | 0.02               |
| Acetone         | 399                         | -                          | <0.01              |
| Acetonitrile    | 400                         | -                          | <0.01              |

**Table S12.** Photophysical properties of **PTZ-F** in various solvents.

| Solvent         | $\lambda_{\text{abs}}$ [nm] | $\lambda_{\text{PL}}$ [nm] | $\Phi_{\text{PL}}$ |
|-----------------|-----------------------------|----------------------------|--------------------|
| Hexane          | 389                         | 418                        | 0.06               |
| Toluene         | 391                         | 452                        | 0.03               |
| Ethyl acetate   | 382                         | 490                        | <0.01              |
| Dichloromethane | 393                         | 501                        | <0.01              |
| Acetone         | 382                         | 511                        | <0.01              |
| Acetonitrile    | 381                         | 524                        | <0.01              |

**Table S13.** Photophysical properties of **CBZ-F** in THF/H<sub>2</sub>O mixed solution.

| Water ration [%] | PL intensity [a.u.] | Quantum yield [-] | Peak wavelength [nm] |
|------------------|---------------------|-------------------|----------------------|
| 0                | 1158                | 0.63              | 542                  |
| 10               | 145                 | 0.11              | 572                  |
| 20               | 70                  | 0.06              | 580                  |
| 30               | 47                  | 0.04              | 577                  |
| 40               | 33                  | 0.03              | 580                  |
| 50               | 22                  | 0.02              | 588                  |
| 60               | 22                  | 0.02              | 588                  |
| 70               | 713                 | 0.36              | 481                  |
| 75               | 697                 | 0.44              | 550                  |
| 80               | 568                 | 0.42              | 543                  |
| 85               | 1179                | 0.59              | 534                  |
| 90               | 948                 | 0.50              | 527                  |

**Table S14.** Photophysical properties of **PIP-F** in THF/H<sub>2</sub>O mixed solution.

| Water ration [%] | PL intensity [a.u.] | Quantum yield [-] | Peak wavelength [nm] |
|------------------|---------------------|-------------------|----------------------|
| 0                | 8.74                | 0.01              | n.d.                 |
| 10               | 7.93                | < 0.01            | n.d.                 |
| 20               | 8.55                | < 0.01            | n.d.                 |
| 30               | 7.56                | < 0.01            | n.d.                 |
| 40               | 6.96                | < 0.01            | n.d.                 |
| 50               | 8.09                | < 0.01            | n.d.                 |
| 60               | 7.33                | < 0.01            | n.d.                 |
| 70               | 61.4                | 0.06              | 551                  |
| 75               | 66.1                | 0.07              | 552                  |
| 80               | 73.6                | 0.08              | 548                  |
| 85               | 61.1                | 0.07              | 554                  |
| 90               | 57.1                | 0.06              | 556                  |

(a) **CBZ-F**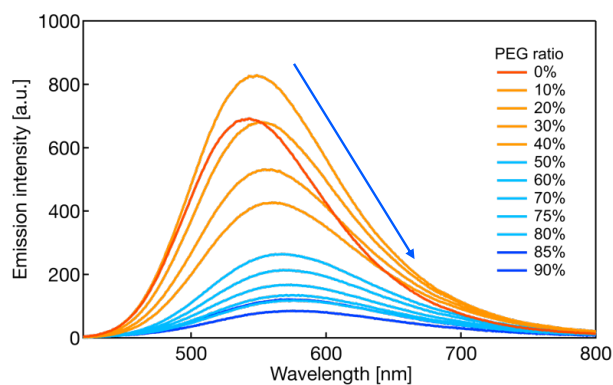(b) **PIP-F**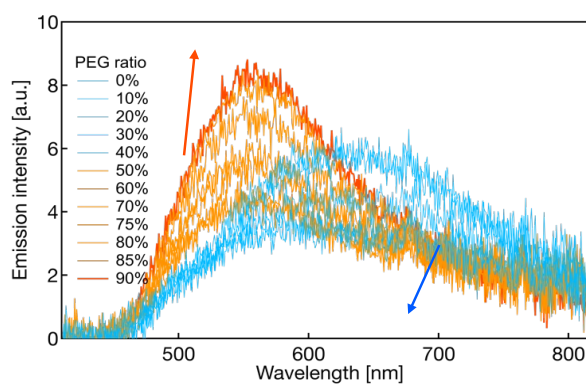**Figure S21.** PL spectra of (a) **CBZ-F** and (b) **PIP-F** in THF/polyethylene glycol (PEG) mixed solution.**Table S15.** Photophysical properties of **CBZ-F** in THF/PEG mixed solution.

| PEG ratio [%] | PL intensity [a.u.] | Quantum yield [-] | Peak wavelength [nm] |
|---------------|---------------------|-------------------|----------------------|
| 0             | 695                 | 0.61              | 543                  |
| 10            | 829                 | 0.50              | 548                  |
| 20            | 681                 | 0.42              | 552                  |
| 30            | 532                 | 0.35              | 558                  |
| 40            | 428                 | 0.29              | 561                  |
| 50            | 265                 | 0.20              | 567                  |
| 60            | 214                 | 0.17              | 568                  |
| 70            | 168                 | 0.14              | 573                  |
| 75            | 136                 | 0.13              | 571                  |
| 80            | 120                 | 0.12              | 576                  |
| 85            | 123                 | 0.13              | 571                  |
| 90            | 87                  | 0.11              | 575                  |

**Table S16.** Photophysical properties of **PIP-F** in THF/PEG mixed solution.

| PEG ratio [%] | PL intensity [a.u.] | Quantum yield [-] | Peak wavelength [nm] |
|---------------|---------------------|-------------------|----------------------|
| 0             | 7.0                 | 0.011             | 625                  |
| 10            | 6.6                 | 0.009             | 677                  |
| 20            | 5.1                 | 0.007             | 682                  |
| 30            | 4.3                 | 0.006             | 683                  |
| 40            | 5.1                 | 0.006             | 599                  |
| 50            | 5.1                 | 0.006             | 548                  |
| 60            | 5.1                 | 0.007             | 580                  |
| 70            | 6.2                 | 0.008             | 536                  |
| 75            | 6.5                 | 0.009             | 562                  |
| 80            | 8.1                 | 0.010             | 550                  |
| 85            | 9.0                 | 0.010             | 549                  |
| 90            | 9.7                 | 0.012             | 552                  |

## 5. Dynamic light-scattering measurement

The particle size of nanocrystal and microcrystals formed in THF/H<sub>2</sub>O solvent solution was measured using an ELSZ-1000 (Otsuka Electronics, Co., Ltd.).

(a) **CBZ-F**

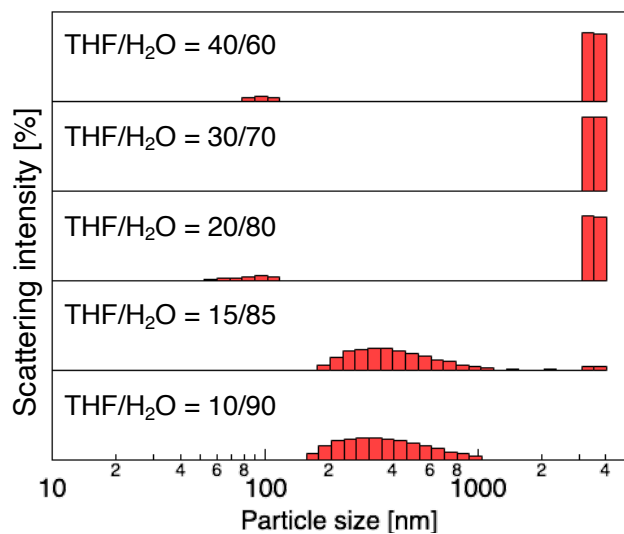

(b) **PIP-F**

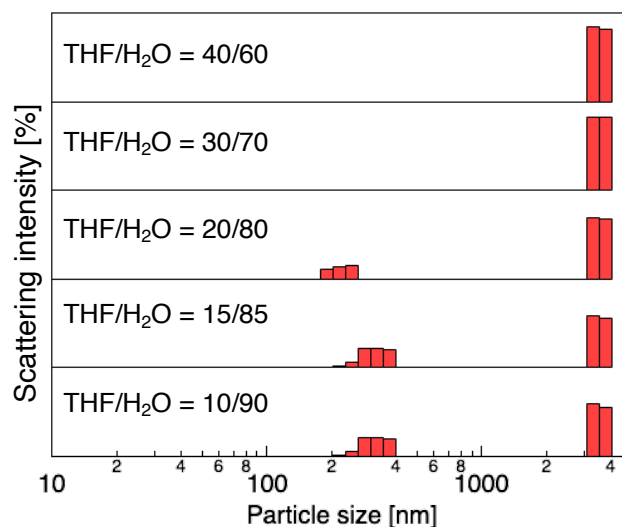

**Figure S22.** DLS profiles of (a) **CBZ-F** and (b) **PIP-F** in THF/H<sub>2</sub>O mixed solution.
